# Supplementary material
Source: publisher site journal article supplement (https://static.cambridge.org/content/id/urn:cambridge.org:id:article:S1834490919000011/resource/name/S1834490919000011supp001.docx)
Supplement: Supplementary file 1 [file S1834490919000011supp001.docx]

Supplementary Information

1. About the *SoReCom A.S. de Rosa @-library*

This multipurpose digital environment of interrelated relational databases has been conceived in the logic of the semantic web, including multiple web interfaces aimed to integrate documentation services with networking and research training, stimulating a rich and ever-growing research and learning environment that is advantageous to research team members, trainees and experts alike. Concerning documentation, the comprehensive bibliographical repository of the literature on social representations, includes an ever-growing collection of references containing not only the classic bibliographic details, but also the author’s and co-authors institutional affiliation and its Country/Continent, the bibliometric indexes (Impact Factor and SJR,) and other useful information for geo-mapping the diffusion and impact of the theory over the world. Moreover, a meta-theoretical repository of the literature on social representations, includes meta-theoretically analysed articles and book chapters, using the on-line grid for the “meta-theoretical analyses” and the guidelines developed by A.S. de Rosa in 1994 and subsequently updated to reflect the developments in the field. In addition, the intelligent @-Library holds a rich documentation of PDF texts, videos, audio-interviews and multi-media scientific and training materials in the field of social representations. Advanced search engine is hyper-linked with these repositories (also using as ontologies the categories of the very detailed “meta-theoretical analysis” grid).

There is an empirical evidence to claim the “So.Re.Com A. S. de Rosa @Library” as the most representative digital platform in the specific domain of Social Representation. In fact an investigation carried out to detect the role of three academic social networks (Academia.edu, ResearchGate and Mendeley) in the dissemination of the Social Representations literature, compared to the 9414 entries filed up to March 2016, in the specialised SoReCom “AS de Rosa” @-library, we had found that 6458 were not found in none of the three academic social networks examined, while only 2956 of the remaining articles have been listed in at least one academic social networks (de Rosa, A.S., Bocci, Dryjanska, Borrelli, 2016; later updated in de Rosa, A.S., Dryjanska, L., Bocci, E. 2017c).

In another empirical work presenting results dated November 2016 (de Rosa, Dryjanska & Bocci, 2017: 1070), aimed at “*profiling authors based on their participation in Academic Social Networks*” we showed that “although useful, the ASNs are not as efficient as the digital repositories of the SoReCom”A.S. de Rosa” @-library in gathering information, since there is no systematic effort aimed at saving and categorizing all scientific production; in fact, what is available in the ASNs is only what the authors decide to share. Likewise, the number of authors who register in the three ASNs: ResearchGate (f=2676), Academia.edu (f=2465) and Mendeley (f=623), appears as much lower compared to the worldwide universe of 6683 authors filed in the SoReCom ”A.S. de Rosa” @-library (de Rosa, 2015a), confirming its position as the most comprehensive digital repository specialised in the scientific field of the theory of social representations. In brief – although the use of ASNs, especially among younger generations of scholars, becomes a common practice in the field of Social Representations, as a tool for bookmarking/downloading full-text publications – our analysis provides empirical evidence that 40,04% of all authors present in the SoReCom ”A.S. de Rosa” @-library are present in the most used ASN (ResearchGate), 36.88% in Academica.edu , 9.32% in Mendeley , while the authors present in at least one of the three ASNs are 3668 constituting 54.89% of the total, and those in all three ASNs at the same time equal 392 (only 5.87%). These results encourage the promotion of the new platform SoReCom “A.S. de Rosa”@-library as open access academic networking tool and not only as scientific documentation repository.”

More information about the SoReCom “A.S. de Rosa”@-library can be found in specific publications (see among others: deRosa, 2015a, 2015b; 2017;de Rosa,A.S., Dryjanska, L.& Bocci, E. 2017b, 2017c)

Table S1

*Distribution of Articles by “Journal’s Name” as Choice for Publication*

| Journal Name | Frequency | Percentage | |
| --- | --- | --- | --- |
| Papers on Social Representations | 13 | 12.15% |
| Asian Journal of Social Psychology | 5 | 4.67% |
| Culture and Psychology | 3 | 2.80% |
| European Journal of Social Psychology | 3 | 2.80% |
| Journal of Pacific Rim Psychology | 3 | 2.80% |
| Youth Studies (青年研究) | 3 | 2.80% |
| Applied Psychology | 2 | 1.87% |
| Journal of Applied Social Psychology | 2 | 1.87% |
| Journal of Community and Applied Social Psychology | 2 | 1.87% |
| Journal of Nanjing Normal University (Social Science Edition) (南京师大学报( 社会科学版)) | 2 | 1.87% |
| Journal of Socio-Economics | 2 | 1.87% |
| Psychology and Developing Societies | 2 | 1.87% |
| Societal and Political Psychology International Review | 2 | 1.87% |
| Sociological Studies (社会学研究) | 2 | 1.87% |
| Studies in Ideological Education (思想教育研究) | 2 | 1.87% |
| Tourism Forum (旅游论坛) | 2 | 1.87% |
| Tourism Tribune (旅游学刊) | 2 | 1.87% |
| Academic Forum (学术论坛) | 1 | 0.93% |
| ACM Transactions on Information Systems | 1 | 0.93% |
| Ageing International | 1 | 0.93% |
| Asia Pacific Journal of Marketing and Logistics | 1 | 0.93% |
| Asia Pacific Journal of Tourism Research | 1 | 0.93% |
| British Journal of Guidance and Counselling | 1 | 0.93% |
| China Agricultural University Journal (Social Sciences Edition)(中国农业大学学报(社会科学版) | 1 | 0.93% |
| Chinese Journal of Rehabilitation (中国康复) | 1 | 0.93% |
| Communications of the Association for Information Systems | 1 | 0.93% |
| Complex systems and complexity science (复杂系统与复杂性科学) | 1 | 0.93% |
| Consciousness and Cognition | 1 | 0.93% |
| Diogenes | 1 | 0.93% |
| Disability & Society | 1 | 0.93% |
| Discourse: Studies in the Cultural Politics of Education | 1 | 0.93% |
| Educational Research | 1 | 0.93% |
| Frontiers (人民论坛·学术前沿） | 1 | 0.93% |
| Human Geography (人文地理) | 1 | 0.93% |
| Intelligence (才智) | 1 | 0.93% |
| International Journal of Conflict Management | 1 | 0.93% |
| Interpersona: An International Journal on Personal Relationships | 1 | 0.93% |
| Israel Affairs | 1 | 0.93% |
| Japanese Journal of Experimental Social Psychology | 1 | 0.93% |
| Journal for the Theory of Social Behaviour | 1 | 0.93% |
| Journal of Business Research | 1 | 0.93% |
| Journal of Changchun University of Technology (Social Sciences Edition) (长春工业大学学报（社会科学版)) | 1 | 0.93% |
| Journal of Conflict Resolution | 1 | 0.93% |
| Journal of Health Psychology | 1 | 0.93% |
| Journal of Heilongjiang College of Education (黑龙江教育学院学报) | 1 | 0.93% |
| Journal of Marriage and Family | 1 | 0.93% |
| Journal of Nantong University (Social Sciences Edition) (南通大学学报（社会科学版)) | 1 | 0.93% |
| Journal of Ningbo University (Educational Science Edition) (宁波大学学报（教育科学版)) | 1 | 0.93% |
| Journal of Sichuan Normal University (Social Sciences Edition) (四川师范大学学报（社会科学版) | 1 | 0.93% |
| Journal of Social Psychology | 1 | 0.93% |
| Journal of the Indian Academy of Applied Psychology | 1 | 0.93% |
| Journal of Travel Research | 1 | 0.93% |
| Journal of Xihua University (Philosophy & Social Sciences) (西华大学学报（哲学社会科学版)) | 1 | 0.93% |
| Journal of Yunnan Nationalities University (Social Sciences Edition) (云南民族大学学报(哲学社会科学版)) | 1 | 0.93% |
| Journal of Yuxi Normal University (玉溪师范学院学报) | 1 | 0.93% |
| Movie Review (电影评介) | 1 | 0.93% |
| Nanjing Social Science (南京社会科学) | 1 | 0.93% |
| Nankai Journal (Philosophy, Literature and Social Science Edition) (南开学报（哲学社会科学版)) | 1 | 0.93% |
| Neuropsychiatrie de l'Enfance et de l'Adolescence | 1 | 0.93% |
| Psychological Studies | 1 | 0.93% |
| Science & Techonology Information (科技信息） | 1 | 0.93% |
| Seeker (求索) | 1 | 0.93% |
| Social Behavior and Personality | 1 | 0.93% |
| Social Cognition | 1 | 0.93% |
| Social Indicators Research | 1 | 0.93% |
| Social Sciences Abroad (国外社会科学) | 1 | 0.93% |
| Study of Ethnics in Guangxi (广西民族研究) | 1 | 0.93% |
| Telematics and Informatics | 1 | 0.93% |
| The Journal of Social Psychology | 1 | 0.93% |
| Theory and Psychology | 1 | 0.93% |
| West Asia and Africa (西亚非洲) | 1 | 0.93% |
| Zhejiang Academic Journal (浙江学刊) | 1 | 0.93% |
| Total | 107 | 100% |
